# Supplementary material for: Ovarian Hyperstimulation Syndrome Due to a Mutation in the Follicle-Stimulating Hormone Receptor
Source: Atypon-hosted journal article supplement (doi:10.1056/nejmoa030064), 2003-08-20
Supplement: nejm_smits_760sa1.pdf [file nejm_smits_760sa1.pdf]

# Supplementary Appendix

This appendix has been provided by the authors to give readers additional information about their work.

Supplement to: Smits G, Olatunbosun O, Delbaere A, et al. Ovarian Hyperstimulation Syndrome Due to a Mutation in the Follicle-Stimulating Hormone Receptor. *N Engl J Med* 2003;349:760-6.

**Supplementary Appendix 1. Primers Used for Sequencing of the Follicle-Stimulating Hormone Receptor.**

|                     |                         |
|---------------------|-------------------------|
| FSHrExon1forward    | GGAGCTTCTGAGATCTGTGG    |
| FSHrExon1reverse    | AAATGCCAGCCATGCAGTTG    |
| FSHrExon2forward    | GACCATGTCAGTTCGGCTAC    |
| FSHrExon2reverse    | TCAACATTACTTTATGGCAAGC  |
| FSHrExon3forward    | CCAGACACAAGGCTCTATGC    |
| FSHrExon3reverse    | GGCAACAGGATGAGACTAGG    |
| FSHrExon4forward    | GTGATAAAAGGCACTGCATG    |
| FSHrExon4reverse    | AGTAATTGCTCCCAGAGTATC   |
| FSHrExon5forward    | GAAATTCATGCTCTAACAACTG  |
| FSHrExon5reverse    | TGGGCAAGACAGATACTGAG    |
| FSHrExon6forward    | AGGTTACATGAGTAGAGCTG    |
| FSHrExon6reverse    | ATCAAAGTGTACTCTGTTGG    |
| FSHrExons7–8forward | TGCTCAGTGCTTCCATTATG    |
| FSHrExons7–8reverse | GAGAGTTGACTTCTAACTTACAC |
| FSHrExon9forward    | TGCCTGCTAACCAAGAGCAG    |
| FSHrExon9reverse    | TGCCTGAGCAGGGCTTAAAG    |
| FSHrExon10Aforward  | GCTATACTGGATCTGAGATG    |
| FSHrExon10Areverse  | ACCACTTCATTGCATAAGTC    |
| FSHrExon10Bforward  | AGGCTAGGGGTGAGAGATCC    |
| FSHrExon10Breverse  | GGTATGCCATCTTCCAAGG     |
| FSHrExon10Cforward  | TCACAACATGCCATTGACTGG   |
| FSHrExon10Creverse  | GCTTTGGACACAGTGATGAGG   |
| FSHrExon10Dforward  | ACATCGTGTCTCCTCTAGTG    |
| FSHrExon10Dreverse  | AATGTGTAGAAGCACTGTCAGC  |
